# Supplementary material
Source: PubMed Central journal article supplement (PMC4516666)
Supplement: NIHMS697745-supplement.pdf [file NIHMS697745-supplement.pdf]

**Supplemental Table 1.** Fatty acid content of the diets and Intralipid®.

| Fatty acid      | Control diet           | HFD               | LF-HSD            | Intralipid®        |
|-----------------|------------------------|-------------------|-------------------|--------------------|
|                 | $\mu\text{mol/g food}$ |                   |                   | $\mu\text{mol/ml}$ |
| 16:0            | 14.7 $\pm$ 0.3         | 106.5 $\pm$ 6.1   | 12.5 $\pm$ 1.0    | 57.3 $\pm$ 4.7     |
| 16:1            | 0.21 $\pm$ 0.01        | 8.6 $\pm$ 0.4     | 0.62 $\pm$ 0.01   | 0.59 $\pm$ 0.06    |
| 18:0            | 7.5 $\pm$ 0.1          | 103 $\pm$ 6       | 11.8 $\pm$ 1.4    | 37.8 $\pm$ 2.8     |
| 18:1            | 37.3 $\pm$ 0.7         | 259 $\pm$ 16      | 30.9 $\pm$ 1.0    | 148 $\pm$ 14       |
| 18:2            | 63.4 $\pm$ 1.6         | 159 $\pm$ 8       | 34.1 $\pm$ 1.6    | 297 $\pm$ 25       |
| 18:3            | 5.2 $\pm$ 0.2          | 8.9 $\pm$ 1.6     | 3.2 $\pm$ 0.1     | 35.2 $\pm$ 3.0     |
| 20:0            | 2.0 $\pm$ 0.0          | 6.4 $\pm$ 0.5     | 1.2 $\pm$ 0.1     | 8.2 $\pm$ 0.5      |
| 20:1            | 1.4 $\pm$ 0.0          | 13.4 $\pm$ 0.8    | 1.2 $\pm$ 0.0     | 2.2 $\pm$ 0.2      |
| 20:2            | 0.13 $\pm$ 0.00        | 9.6 $\pm$ 0.6     | 0.67 $\pm$ 0.02   | 0.41 $\pm$ 0.03    |
| 20:3            | 0.017 $\pm$ 0.004      | 3.0 $\pm$ 0.2     | 0.21 $\pm$ 0.01   | 0.22 $\pm$ 0.03    |
| 20:4            | 0.045 $\pm$ 0.030      | 2.7 $\pm$ 0.1     | 0.20 $\pm$ 0.01   | 1.7 $\pm$ 0.2      |
| 20:5            | nd                     | 0.070 $\pm$ 0.007 | 0.010 $\pm$ 0.001 | nd                 |
| 22:0            | 2.1 $\pm$ 0.0          | 1.9 $\pm$ 0.1     | 1.3 $\pm$ 0.1     | 6.8 $\pm$ 0.5      |
| 22:1            | 0.28 $\pm$ 0.00        | 0.47 $\pm$ 0.02   | 0.066 $\pm$ 0.008 | 0.17 $\pm$ 0.01    |
| 22:4            | 0.019 $\pm$ 0.004      | 1.5 $\pm$ 0.1     | 0.11 $\pm$ 0.00   | 0.14 $\pm$ 0.01    |
| 22:5            | nd                     | 0.93 $\pm$ 0.06   | 0.079 $\pm$ 0.003 | 0.26 $\pm$ 0.01    |
| 22:6            | nd                     | 0.23 $\pm$ 0.01   | 0.021 $\pm$ 0.000 | 1.3 $\pm$ 0.1      |
| Total           | 134 $\pm$ 3            | 685 $\pm$ 40      | 98.2 $\pm$ 5.1    | 598 $\pm$ 51       |
| Saturated       | 26.3 $\pm$ 0.4         | 218 $\pm$ 13      | 26.7 $\pm$ 2.5    | 110 $\pm$ 9        |
| Monounsaturated | 39.0 $\pm$ 0.8         | 280 $\pm$ 17      | 32.8 $\pm$ 1.0    | 151 $\pm$ 14       |
| Polyunsaturated | 68.8 $\pm$ 1.6         | 186 $\pm$ 10      | 38.7 $\pm$ 1.7    | 337 $\pm$ 28       |
| Unsaturated     | 108 $\pm$ 2            | 467 $\pm$ 27      | 73.3 $\pm$ 3.7    | 488 $\pm$ 43       |

Values are mean  $\pm$  SEM (n=3)

nd: not detected
